# Supplementary material for: Metabolomics Insights of the Immunomodulatory Activities of Phlorizin and Phloretin on Human THP-1 Macrophages
Source: PubMed Central journal article supplement (PMC7913540; doi:10.3390/molecules26040787), 2021-02-03
Supplement: molecules-26-00787-s001.pdf [file molecules-26-00787-s001.pdf]

**Table S1.** Significantly changed metabolites (FC > 2.0 and p-value ≤ 0.05) within THP-1 cells treated with lipopolysaccharide (LPS); pure dihydrochalcones (phlorizin (PZ), phloretin (PT)); and pure dihydrochalcones with LPS (PZ+ LPS (PZL) and PT+LPS (PTL)); in comparison with untreated controls (Basal). Results were expressed in terms of Log FC [(Treatment) vs (Basal)], representing the most significant metabolic pathways and its putative metabolites.

| Compound                                           | System | RT    | Mass     | LPS    | PZ     | PT      | PZL    | PTL     |
|----------------------------------------------------|--------|-------|----------|--------|--------|---------|--------|---------|
| <i>Aminoacyl-tRNA biosynthesis</i>                 |        |       |          |        |        |         |        |         |
| D-aspartate                                        | LC     | 30.22 | 176.9992 |        |        | -20.752 |        | -20.416 |
| Glycine                                            | GC     | 6.73  | 75       | 10.174 | 10.771 | 9.384   | 11.458 | 12.698  |
| L-asparagine                                       | GC     | 15.13 | 73       |        |        | 9.679   | 9.783  | 12.817  |
| L-isoleucine                                       | GC     | 9.61  | 86       | 7.735  | 6.768  | 6.332   | 8.847  | 10.146  |
| L-leucine                                          | GC     | 15.01 | 158      | 7.292  |        | 11.215  | 14.274 | 16.684  |
| L-glutamate                                        | GC     | 15.66 | 246      | 6.491  | 3.162  | 13.365  | 15.719 | 16.041  |
| L-phenylalanine                                    | GC     | 16.20 | 73       | 9.423  | 3.162  | 9.056   | 12.524 | 12.435  |
| L-proline                                          | GC     | 9.84  | 70       | 12.688 |        |         |        |         |
| L-threonine                                        | GC     | 11.51 | 73       | 6.559  | 5.458  | 7.148   | 8.652  | 7.458   |
| L-valine                                           | GC     | 15.29 | 73       | 18.236 |        | 16.679  | 16.875 | 13.774  |
| <i>Valine, leucine and isoleucine biosynthesis</i> |        |       |          |        |        |         |        |         |
| Glycine                                            | GC     | 6.73  | 75       | 10.174 | 10.771 | 9.384   | 11.458 | 12.698  |
| L-isoleucine                                       | GC     | 9.61  | 86       | 7.735  | 6.768  | 6.332   | 8.847  | 10.146  |
| L-leucine                                          | GC     | 15.01 | 158      | 7.292  |        | 11.215  | 14.274 | 16.684  |
| L-leucine                                          | GC     | 15.01 | 158      | 7.292  |        | 11.215  | 14.274 | 16.684  |
| L-threonine                                        | GC     | 11.51 | 73       | 6.559  | 5.458  | 7.148   | 8.652  | 7.458   |
| L-valine                                           | GC     | 15.29 | 73       | 18.236 |        | 16.679  | 16.875 | 13.774  |
| <i>Alanine, aspartate and glutamate metabolism</i> |        |       |          |        |        |         |        |         |
| D-aspartate                                        | LC     | 30.22 | 176.9992 |        |        | -20.752 |        | -20.416 |
| L-asparagine                                       | GC     | 15.13 | 73       |        |        | 9.679   | 9.783  | 12.817  |
| L-glutamate                                        | GC     | 15.66 | 246      | 6.491  | 3.162  | 13.365  | 15.719 | 16.041  |
| N-acetyl-L-aspartate                               | GC     | 17.46 | 73       |        | 5.537  | 13.163  | 13.019 | 13.587  |
| N-methylglutamate                                  | GC     | 15.22 | 260      |        | 3.359  | 15.631  | 12.647 | 15.736  |

Table S1. Continued.

| Compound                              | System | RT    | Mass     | LPS    | PZ      | PT      | PZL     | PTL     |
|---------------------------------------|--------|-------|----------|--------|---------|---------|---------|---------|
| <i>Arginine biosynthesis</i>          |        |       |          |        |         |         |         |         |
| Urea                                  | GC     | 11.09 | 147      | 7.726  | 3.242   | 14.155  | 17.268  | 17.611  |
| L-glutamate                           | GC     | 15.66 | 246      | 6.491  | 3.162   | 13.365  | 15.7186 | 16.041  |
| <i>Glycerophospholipid metabolism</i> |        |       |          |        |         |         |         |         |
| Dihydroxyacetone phosphate            | GC     | 17.15 | 73       | 12.210 |         |         |         |         |
| Glycerol 1-phosphate                  | GC     | 17.34 | 73       | 7.176  |         |         |         |         |
| LysoPE(18:1(11Z)/0:0) 19.980001       | LC     | 19.98 | 479.3006 | -1.472 |         |         |         |         |
| LysoPE(20:4(8Z,11Z,14Z,17Z)/0:0)      | LC     | 19.10 | 501.2839 | -1.124 |         |         |         |         |
| O-phosphoethanolamine                 | GC     | 17.62 | 73       | 12.784 | -2.838  |         | 1.443   | 1.702   |
| PE(14:0/21:0)[U]                      | LC     | 29.84 | 733.5603 |        | -3.708  | -18.053 | -1.699  | -18.433 |
| PE(16:0/20:1(11Z))                    | LC     | 29.84 | 762.5902 |        |         |         | -16.711 | -16.824 |
| PE(18:1(9Z)/0:0)                      | LC     | 19.29 | 501.2800 |        | 13.559  |         | 13.559  |         |
| PE(18:1(9Z)/20:0)[U]                  | LC     | 29.84 | 773.6003 |        | -14.272 | -14.438 | -14.553 | -14.879 |
| PE(19:0/0:0)                          | LC     | 23.80 | 495.3360 |        |         | 15.318  |         |         |
| PE(21:0/0:0)                          | LC     | 21.40 | 523.362  | 1.891  |         |         |         |         |
| PE(22:4(7Z,10Z,13Z,16Z)/17:0)         | LC     | 29.69 | 781.568  | 1.080  |         |         |         |         |
| PG(14:0/15:0)                         | LC     | 25.84 | 697.4879 |        |         | 1.633   | 2.817   | 1.452   |
| PG(14:0/15:0) Esi+26.904219           | LC     | 26.90 | 697.4886 |        |         | 3.509   |         | 3.303   |
| PG(15:0/12:0)                         | LC     | 25.86 | 669.4590 |        |         | 1.181   |         |         |
| PG(15:0/12:0) Esi+25.798006           | LC     | 25.80 | 669.4593 |        |         | 14.688  |         | 14.286  |
| PG(15:0/18:2(9Z,12Z))                 | LC     | 23.77 | 732.4918 | 1.239  |         |         |         |         |
| PG(15:0/16:0)                         | LC     | 26.94 | 725.5173 | -5.161 |         | 1.873   |         | 1.795   |
| PG(18:0/0:0)                          | LC     | 21.10 | 529.3346 |        |         |         |         | 13.66   |
| PC(18:0/18:1(6Z))                     | LC     | 29.84 | 787.6075 |        | -1.723  |         |         |         |
| PC(18:1(17Z)/18:1(17Z))               | LC     | 29.83 | 785.5922 |        | -3.154  | -17.522 | -8.267  | -8.462  |
| PC(19:1(9Z)/15:0)                     | LC     | 29.83 | 759.5754 |        | -1.654  | -18.993 | -18.259 | -19.287 |
| PG(20:5(5Z,8Z,11Z,14Z,17Z)/0:0)       | LC     | 22.20 | 530.2640 |        |         | 1.887   |         | 1.982   |

Table S1. Continued.

| Compound                                                                                     | System | RT    | Mass      | LPS     | PZ     | PT      | PZL    | PTL     |
|----------------------------------------------------------------------------------------------|--------|-------|-----------|---------|--------|---------|--------|---------|
| <i>Glycerophospholipid metabolism</i>                                                        |        |       |           |         |        |         |        |         |
| PG(20:3(8Z,11Z,14Z)/15:0)                                                                    | LC     | 23.75 | 758.507   | -1.306  |        |         |        |         |
| PG(22:4(7Z,10Z,13Z,16Z)/15:1(9Z))                                                            | LC     | 23.75 | 782.5088  | -1.396  |        |         |        |         |
| PS(22:1(11Z)/17:0)                                                                           | LC     | 24.16 | 831.6009  | 1.720   |        |         |        |         |
| PS(22:4(7Z,10Z,13Z,16Z)/22:1(11Z))                                                           | LC     | 19.84 | 893.6108  | -10.279 |        |         |        |         |
| PS(P-20:0/16:0)                                                                              | LC     | 20.83 | 775.5722  | -3.236  |        |         |        |         |
| <i>sn</i> -glycero-3-phosphocholine                                                          | LC     | 1.42  | 257.1026  | 1.619   |        |         |        | -15.932 |
| <i>Sphingolipid metabolism</i>                                                               |        |       |           |         |        |         |        |         |
| Cer(d16:1/18:0)                                                                              | LC     | 23.82 | 559.4912  | 2.743   |        |         |        | 1.403   |
| Cer(d16:1/18:0) 25.460001                                                                    | LC     | 25.46 | 537.5093  | -2.568  |        |         |        |         |
| Cer(d16:2(4E,6E)/20:1(11Z))                                                                  | LC     | 23.57 | 583.4890  |         |        |         |        | 14.855  |
| Cer(d16:1/20:0)                                                                              | LC     | 27.09 | 565.5392  | -1.576  |        |         |        |         |
| Cer(d16:2(4E,6E)/18:0)                                                                       | LC     | 24.69 | 535.4931  | 3.245   |        |         |        |         |
| Cer(d18:0/12:0)                                                                              | LC     | 23.70 | 483.4590  | -2.580  |        | -17.287 |        |         |
| Cer(d18:0/12:0) Esi+23.715666                                                                | LC     | 23.72 | 483.4620  |         |        | 17.812  |        | 17.829  |
| Cer(d18:0/14:0)                                                                              | LC     | 24.87 | 511.4968  | -3.844  |        |         |        |         |
| Cer(d18:0/14:0) 25.700006                                                                    | LC     | 25.70 | 511.4966  | 8.228   |        |         |        |         |
| Cer(d18:0/14:0) 26.140007                                                                    | LC     | 26.14 | 511.4958  | 3.400   |        |         |        |         |
| Cer(d18:0/16:0)                                                                              | LC     | 27.07 | 539.5278  | -2.905  |        |         |        |         |
| Cer(d18:0/16:0) 26.459995                                                                    | LC     | 26.46 | 539.5278  | 2.473   |        |         |        |         |
| Cer(d18:0/16:0) 27.549995                                                                    | LC     | 27.55 | 539.5266  | -2.925  |        |         |        |         |
| Cer(d20:0/16:0)                                                                              | LC     | 28.32 | 567.5546  |         |        |         | -2.445 | 1.073   |
| NeuGcalpha2-3Galbeta1-4GlcNAcbeta1-3Galbeta1-4GlcNAcbeta1-3Galbeta1-4Glcbeta-Cer(d18:1/16:0) | LC     | 22.51 | 1942.9373 |         |        | 1.949   |        | 4.372   |
| O-phosphoethanolamine                                                                        | GC     | 17.62 | 73        | 12.784  | -2.838 | 1.667   | 1.443  | 1.702   |
| Phytosphingosine                                                                             | LC     | 17.84 | 317.2906  |         |        |         |        | 16.862  |
